# Supplementary material for: 2D Hybrid perovskite incorporating cage-confined secondary ammonium cations toward effective photodetection
Source: Royal Society of Chemistry journal article supplement (doi:10.1039/d1cc05705g), 2021-12-02
Supplement: d1cc05705g1.pdf [file d1cc05705g1.pdf]

## Supporting Information

### 2D Hybrid Perovskite Incorporating Cage-Confined Secondary Ammonium Cation toward Effective Photodetection

Lina Hua, Huaixi Chen, Shiguo Han, Haojie Xu, Lei Lu, Liwei Tang, Beibei Wang, Junhua Luo and Zhihua Sun\*

#### 1. Experimental section

**Synthesis and Characterization of  $(i\text{-BA})_2(\text{DMA})\text{Pb}_2\text{Br}_7$ :** All the chemical reagents were purchased from commercial suppliers and used without further purification. A mixture of *n*-isobutylamine (98% *wt*), dimethylamine (98% *wt*) and lead acetate trihydrate (the molar ratio: 2:1:2) dissolved in concentrated HBr (48 % *wt*) were placed in a glass vial by heating, forming a bright yellow solution. The temperature-cooling technique was utilized to control the crystal growth. Large yellow bulk crystals grew in an oven, of which the initial temperature was set at 80°C and the cooling rate was 0.5°C per day. Powder X-ray diffractometry (PXRD) data were measured at room temperature, using a Mini Flex II Powder X-ray diffractometer. The UV-vis absorption spectra were recorded with a PerkinElmer Lambda 950 UV-vis-IR Spectrophotometer. Thermogravimetric analyses (TGA) were performed in the range of 300-1200 K using the STA449C Thermal Analyser. Calculations on the band structures and partial density of states were performed with the single-crystal structure data by the total energy code CASTEP in the framework of DFT. The general gradient approximation functional of Perdew-Burke-Ernzerhof was employed. The core-electrons interactions were described by the norm-conserving pseudopotentials. The other parameters and convergent criteria were the default values of CASTEP code.

**Crystal Structure Determination:** The single crystal X-ray diffractions were measured on a Bruker D8 diffractometer with Mo K $\alpha$  radiation ( $\lambda = 0.77 \text{ \AA}$ ) at 330 K. The crystal

structure of  $\text{IA}_2(\text{DMA})\text{Pb}_2\text{Br}_7$  was solved by using the direct methods and refined by the full-matrix method based on  $F^2$  using the SHELXS-97 software package. As for the non-hydrogen atoms, the different Fourier maps and anisotropic refinement were performed by using SHELXL-97. Crystal data, structure refinements, and selected parameters are listed in Tables S1–S4 (Supporting Information).

**Fabrication and Measurements of Photodetectors:** The planar array photodetectors were fabricated on the high-quality crystal wafers. A square copper mesh was used as a mask to get the patterned Au electrode. The channel length (L) and width (W) of the device were 230 and 30  $\mu\text{m}$ , respectively. The  $I$ - $V$  measurements were performed using a Keithley 6517B source meter on a probe station (EverBeing, PE4). Laser diodes with 405 nm (LP405-SF10) were used as light source by applying a voltage of 10 V. The power intensity of light sources was carefully measured using a power meter (Thorlabs GmbH., PM 100D). The steady state response time was carried by illuminating the sample with a 405 nm laser, the high-speed Tektronix MDO3014 Oscilloscope was used to record the output. For polarization-sensitive photodetection, the linearly polarized light was obtained through a half-wave plate, and then rotate the half-wave plate during the measurement. All measurements were performed in ambient conditions at room temperature.

## Figures

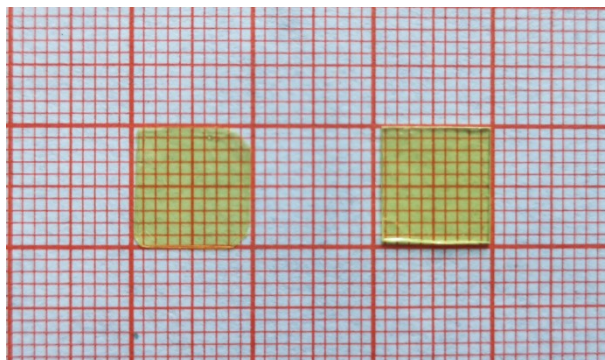

**Figure S1.** Bulk crystal of **1** with the dimension of  $10 \times 9 \times 2 \text{ mm}^3$ .

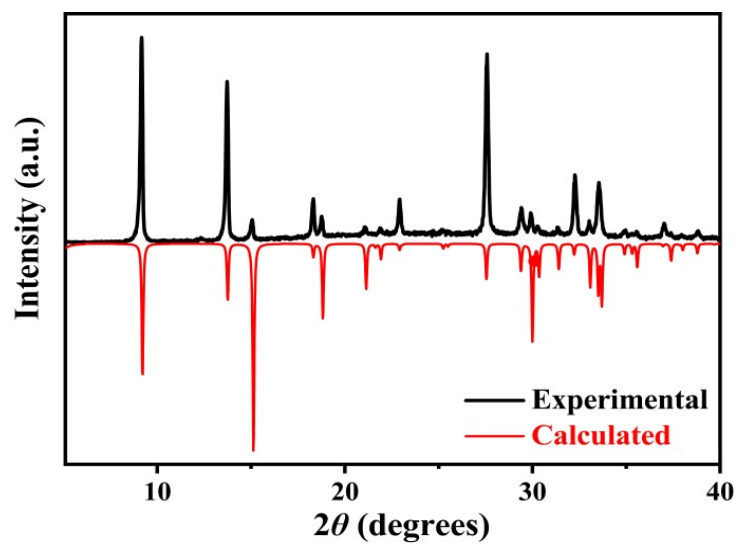

**Figure S2.** Experimental and calculated powder X-ray diffraction patterns of **1** at room temperature.

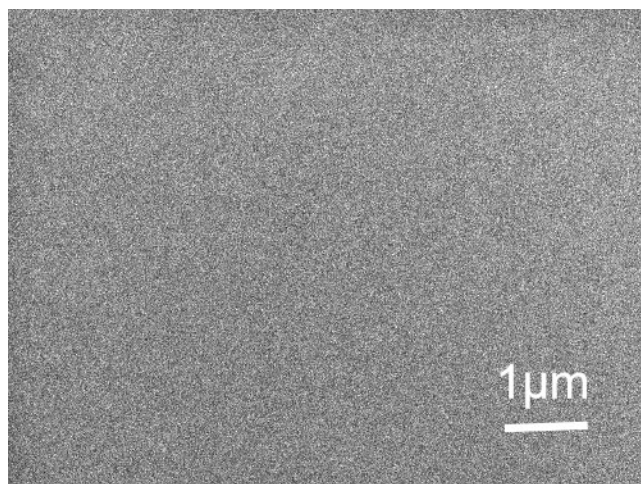

**Figure S3.** SEM image of crystal surface for **1**.

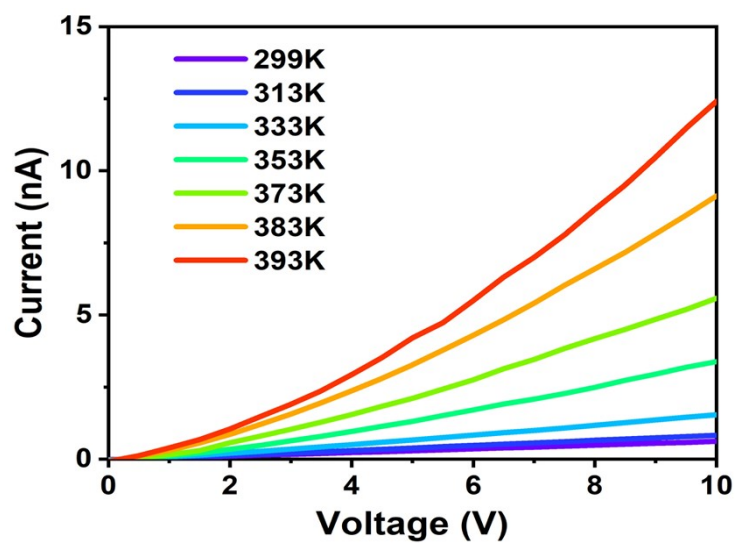

**Figure S4.** The current–voltage graphs measured at different temperatures.

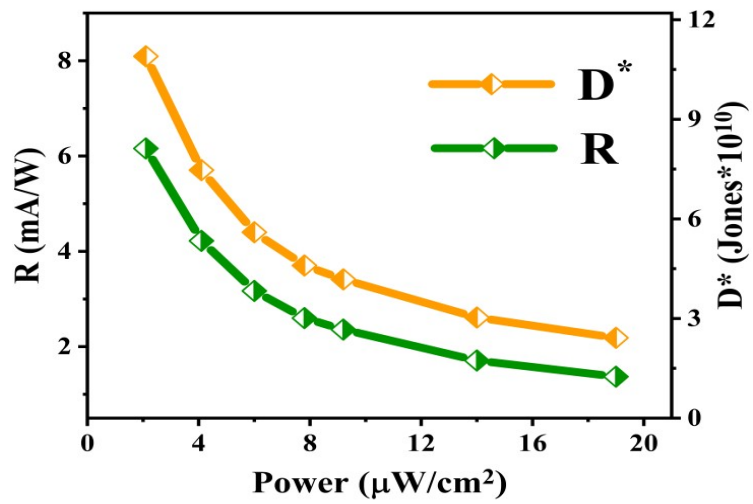

**Figure S5.** Responsivity and detectivity as a function of the incident light intensity based on the single-crystal photodetector.

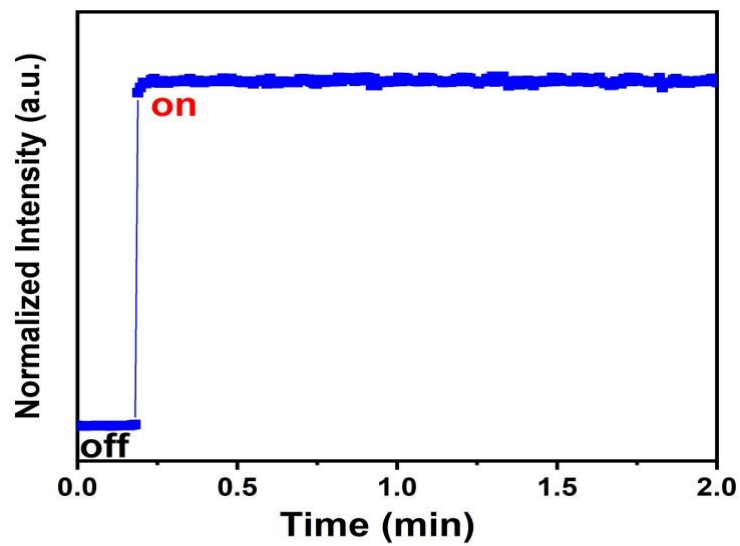

**Figure S6.** The stability test of the device under constant illumination.

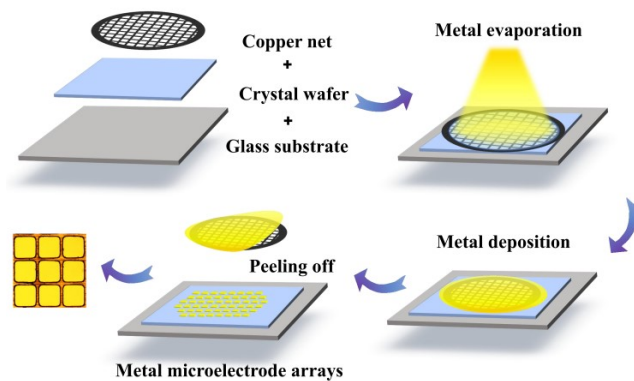

**Figure S7.** Schematic illustration of the photodetector based on the high-quality bulk crystal of **1**.

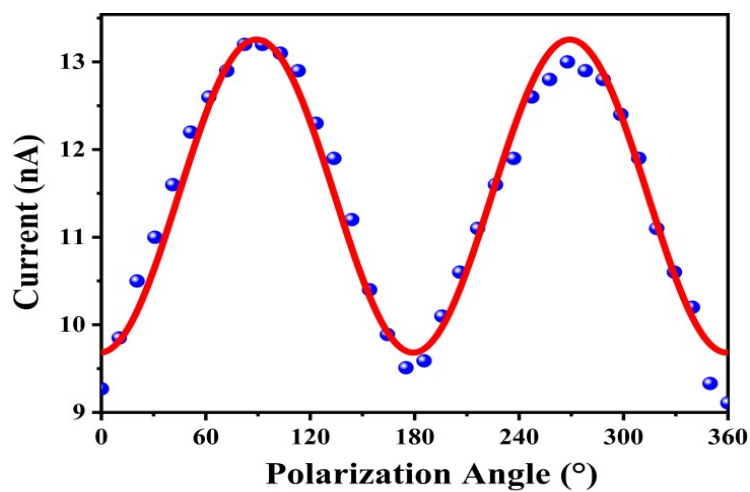

**Figure S8.** Polarization-dependence of photocurrents for **1**.

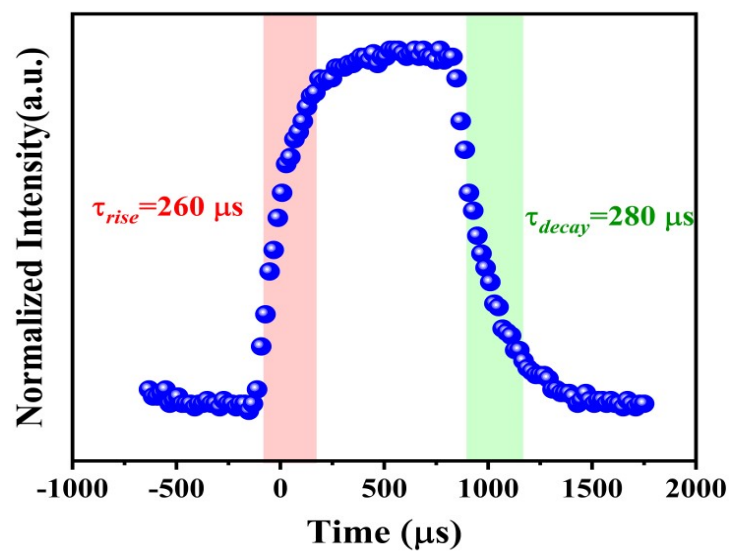

Figure S9. Rise and fall process of photocurrent responses during on/off illumination switching.

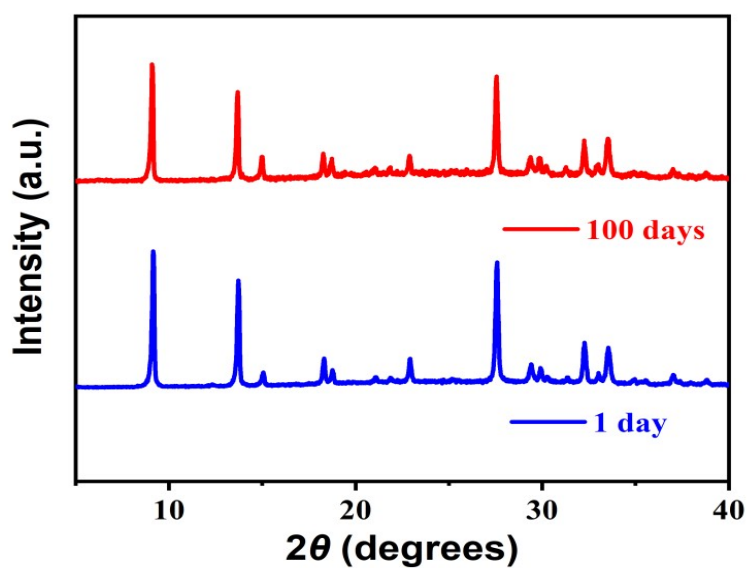

Figure S10. Powder X-ray diffraction patterns of **1** recorded on the sample after one day and 100 days.

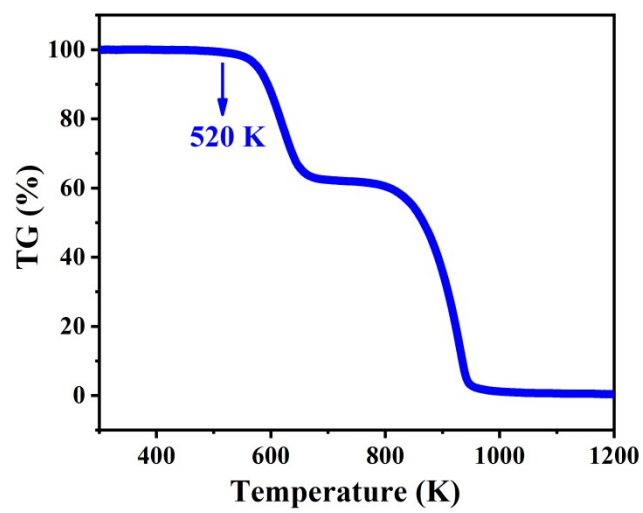

**Figure S11.** TG curve shows the thermal stability of **1** up to 520 K.



**Table S1.** Crystal data and structure refinement for **1**.

|                                             | Room Temperature                                                               | High Temperature                                                               |
|---------------------------------------------|--------------------------------------------------------------------------------|--------------------------------------------------------------------------------|
|                                             | Date                                                                           | Date                                                                           |
| Empirical formula                           | C <sub>10</sub> H <sub>32</sub> Br <sub>7</sub> N <sub>3</sub> Pb <sub>2</sub> | C <sub>10</sub> H <sub>32</sub> Br <sub>7</sub> N <sub>3</sub> Pb <sub>2</sub> |
| Formula weight                              | 1168.13                                                                        | 1168.13                                                                        |
| Temperature/K                               | 299 K                                                                          | 330 K                                                                          |
| Crystal system                              | tetragonal                                                                     | tetragonal                                                                     |
| Space group                                 | <i>I4/mmm</i>                                                                  | <i>I4/mmm</i>                                                                  |
| <i>a</i> /Å                                 | 6.0037(11)                                                                     | 5.9841(2)                                                                      |
| <i>b</i> /Å                                 | 6.0037(11)                                                                     | 5.9841(2)                                                                      |
| <i>c</i> /Å                                 | 39.308(13)                                                                     | 39.049(3)                                                                      |
| <i>α</i> /°                                 | 90                                                                             | 90                                                                             |
| <i>β</i> /°                                 | 90                                                                             | 90                                                                             |
| <i>γ</i> /°                                 | 90                                                                             | 90                                                                             |
| Volume/ Å <sup>3</sup>                      | 1416.8(7)                                                                      | 1398.33(14)                                                                    |
| Z                                           | 2                                                                              | 2                                                                              |
| $\rho_{\text{calc}} / \text{cm}^3$          | 2.738                                                                          | 2.774                                                                          |
| $\mu / \text{mm}^{-1}$                      | 21.738                                                                         | 22.025                                                                         |
| <i>F</i> (000)                              | 1044.0                                                                         | 1044.0                                                                         |
| Radiation                                   | MoK $\alpha$ ( $\lambda = 0.71073$ )                                           | MoK $\alpha$ ( $\lambda = 0.71073$ )                                           |
| 2 $\theta$ range for data collection/°      | 6.866 to 54.524                                                                | 6.26 to 55.144                                                                 |
| Index ranges                                | -7 $\leq h \leq$ 7, -7 $\leq k \leq$ 7,<br>-50 $\leq l \leq$ 49                | -6 $\leq h \leq$ 7, -7 $\leq k \leq$ 7,<br>-50 $\leq l \leq$ 46                |
| Independent reflections                     | 541 [ <i>R</i> <sub>int</sub> = 0.0453,<br><i>R</i> <sub>sigma</sub> = 0.0311] | 545 [ <i>R</i> <sub>int</sub> = 0.0490,<br><i>R</i> <sub>sigma</sub> = 0.0328] |
| Goodness-of-fit on <i>F</i> <sup>2</sup>    | 1.409                                                                          | 1.194                                                                          |
| Data/restraints/parameters                  | 541/97/91                                                                      | 545/18/50                                                                      |
| Final R indexes [ <i>I</i> > = 2 $\sigma$ ] | <i>R</i> <sub>1</sub> = 0.0913,                                                | <i>R</i> <sub>1</sub> = 0.0741,                                                |

|                                          |                 |                 |
|------------------------------------------|-----------------|-----------------|
| (l)]                                     | $wR_2 = 0.2812$ | $wR_2 = 0.2190$ |
| Final R indexes [all data]               | $R_1 = 0.0962,$ | $R_1 = 0.0791,$ |
|                                          | $wR_2 = 0.2910$ | $wR_2 = 0.2262$ |
| Largest diff. peak/hole/eÅ <sup>-3</sup> | 1.79/-3.35      | 1.81/-2.12      |

**Table S2.** Bond lengths for **1**

| Atom | Atom | Length/Å   | Atom | Atom | Length/Å  |
|------|------|------------|------|------|-----------|
| Pb1  | Br3  | 3.0051(6)  | C1   | C2   | 1.502(12) |
| Pb1  | Br2  | 2.835(3)   | C1   | N1   | 1.513(14) |
| Pb1  | Br1  | 3.2063(12) | C4   | C2   | 1.497(12) |
| C5   | N2   | 1.501(13)  | C2   | C3   | 1.500(11) |
| N2   | C6   | 1.501(13)  |      |      |           |

<sup>1</sup>1-Y,+X,+Z; <sup>2</sup>1-Y,1+X,+Z; <sup>3</sup>1+X,+Y,+Z

**Table S3.** Bond Angles for **1**.

| Atom                      | Angle/     | Atom                     | Angle/    |
|---------------------------|------------|--------------------------|-----------|
| Br3-Pb1-Br3 <sup>1</sup>  | 89.875(5)  | Pb1-Br1-Pb1 <sup>5</sup> | 180.0     |
| Br3-Pb1-Br3 <sup>2</sup>  | 174.64(10) | C6-N2-C5                 | 112.6(10) |
| Br3-Pb1-Br1               | 92.68(5)   | C2-C1-N1                 | 112.1(11) |
| Br2-Pb1-Br3 <sup>1</sup>  | 87.32(5)   | C4-C2-C1                 | 97.7(8)   |
| Br2-Pb1-Br1               | 180.0      | C4-C2-C3                 | 113.2(10) |
| Pb1 <sup>4</sup> -Br3-Pb1 | 174.65(10) | C3-C2-C1                 | 129.9(13) |

<sup>1</sup>-Y,+X,+Z; <sup>2</sup>1-Y,+X,+Z; <sup>3</sup>+X,1+Y,+Z; <sup>4</sup>+X,-1+Y,+Z; <sup>5</sup>1-X,1-Y,1-Z

**Table S4.** N-H...I hydrogen bonds of **1**.

| D-H                               | d(D-H) | d(H..A) | <DHA   | d(D..A) | A                  |
|-----------------------------------|--------|---------|--------|---------|--------------------|
| N2 <sup>a</sup> -H2B <sup>a</sup> | 0.910  | 2.964   | 138.41 | 3.694   | Br3 [ -y+1, x, z ] |
| N1 <sup>a</sup> -H1D <sup>a</sup> | 0.910  | 2.585   | 151.56 | 3.413   | Br3 [ -y+1, x, z ] |
| N1 <sup>a</sup> -H1E <sup>a</sup> | 0.910  | 2.731   | 151.39 | 3.556   | Br3 [ x, y-1, z ]  |
